# Supplementary material for: Regulated stepwise ESDPT mechanism associated with chalcogen substitutions in BDIBD derivatives
Source: Royal Society of Chemistry journal article supplement (doi:10.1039/d3cp05837a), 2024-01-01
Supplement: d3cp05837a1.pdf [file d3cp05837a1.pdf]

Supporting Information

## Regulated stepwise ESDPT mechanism associated with chalcogen substitutions for BDIBD derivatives

Chang Liu, Jinfeng Zhao\*, Jiahe Chen, Mingwei Wang, Mengmeng Hou, Liang Yang

*College of Physical Science and Technology, Shenyang Normal University, Shenyang 110034,*

*China.*

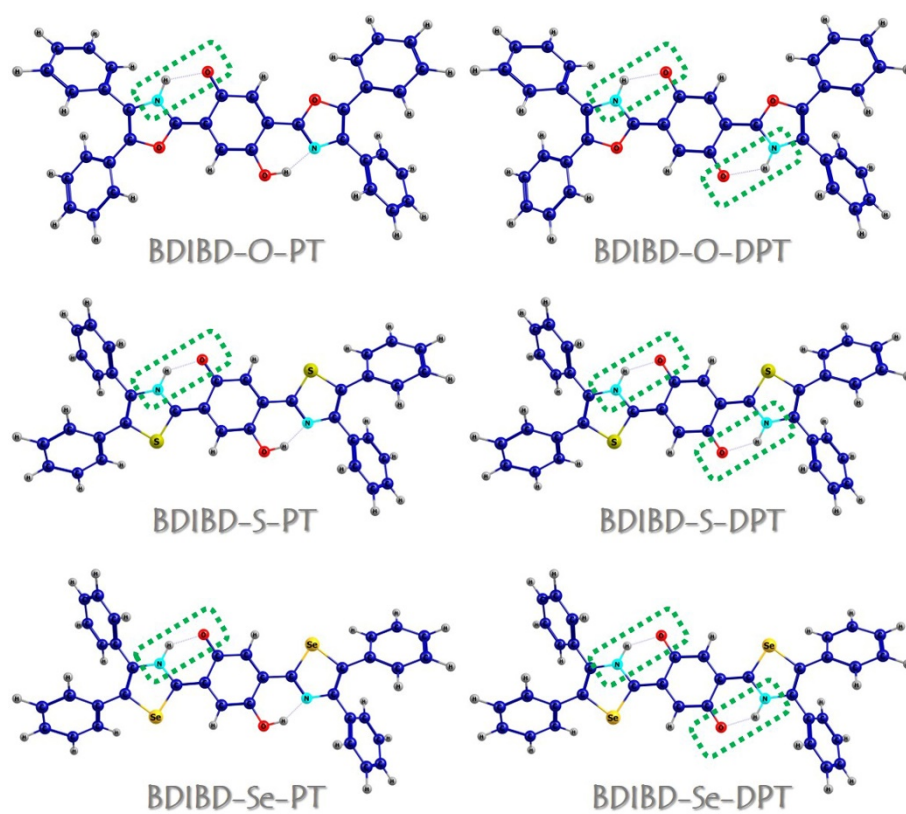

**Figure S1.** Optimized geometries of single proton-transfer BDIBD-O-PT, BDIBD-S-PT and BDIBD-Se-PT as well as the double proton-transfer BDIBD-O-DPT, BDIBD-S-DPT and BDIBD-Se-DPT fluorophores.

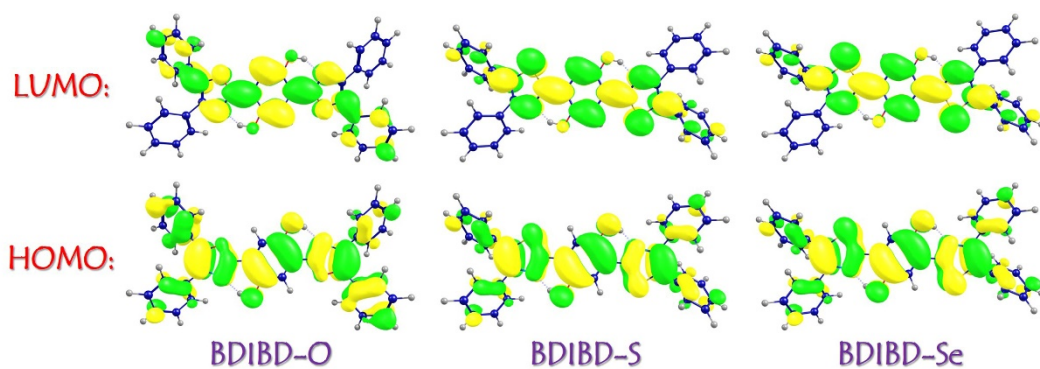

**Figure S2.** HOMO & LUMO orbitals obtained by CAM-B3LYP functional for BDIBD-O, BDIBD-S and BDIBD-Se compounds.

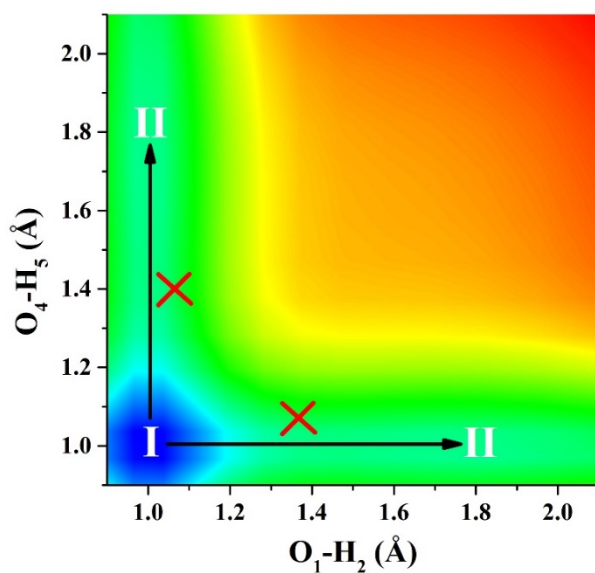

**Figure S3.** The projection plane of  $S_0$ -state PES for BDIBD derivatives. I:  $S_1$ -state BDIBD derivatives; II: BDIBD-PT derivatives.

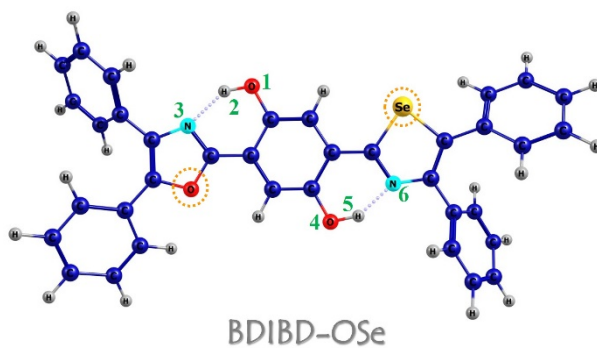

**Figure S4.** Optimized geometry of BDIBD-OSe fluorophore.

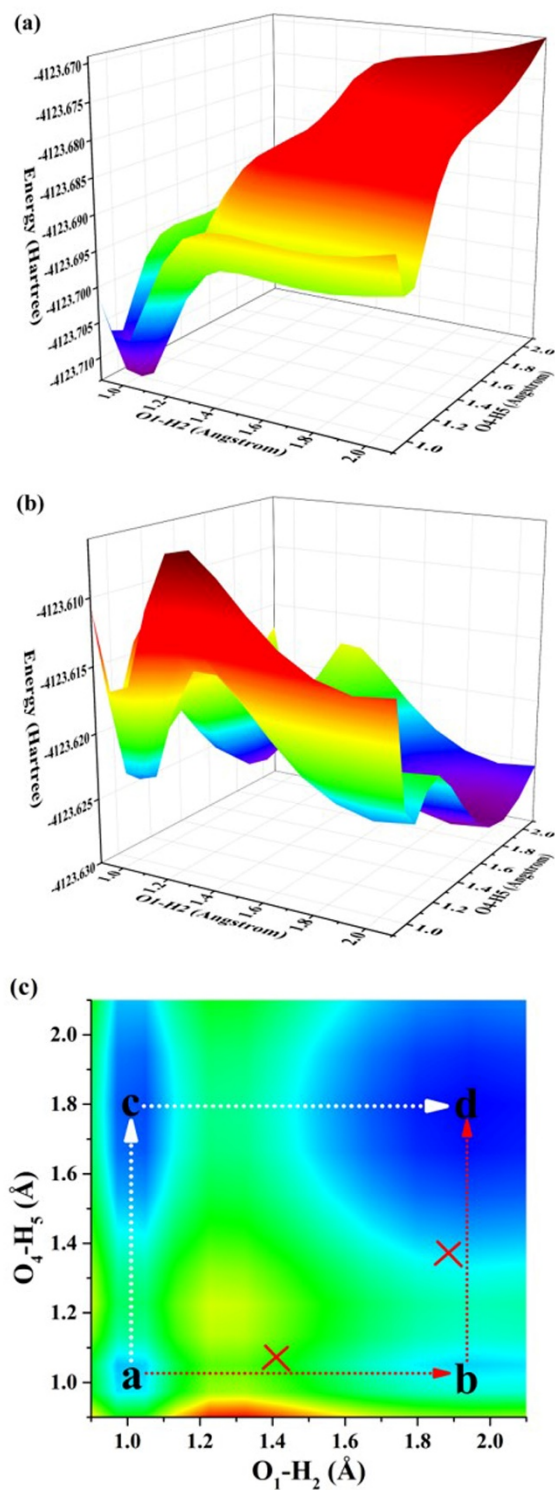

**Figure S5.** (a)  $S_0$ -state PES for BDIBD-OSe, (b)  $S_1$ -state PES for BDIBD-OSe. (c) The projection plane of  $S_1$ -state PES for BDIBD-OSe. Herein, **a** stands for  $S_1$ -state BDIBD-OSe; **b** stands for the  $S_1$ -state single proton-transfer tautomer along with  $O_1-H_2 \cdots N_3$  hydrogen bond; **c** stands for the  $S_1$ -state single proton-transfer tautomer along with  $O_4-H_5 \cdots N_6$  hydrogen bond; **d** stands for the  $S_1$ -state ESDPT tautomer. The stepwise ESDPT should occur along with **a**  $\rightarrow$  **c**  $\rightarrow$  **d** path.

**Table S1.** Parameters of bond lengths (Å) and bond angles ( $\Delta^\circ$ ) involved in dual hydrogen bonds for BDIBD-O-PT, BDIBD-S-PT and BDIBD-Se-PT in CH<sub>3</sub>CN solvent in both S<sub>0</sub> and S<sub>1</sub> states.

|                                          | BDIBD-O-PT     |                | BDIBD-S-PT     |                | BDIBD-Se-PT    |                |
|------------------------------------------|----------------|----------------|----------------|----------------|----------------|----------------|
|                                          | S <sub>0</sub> | S <sub>1</sub> | S <sub>0</sub> | S <sub>1</sub> | S <sub>0</sub> | S <sub>1</sub> |
| O <sub>1</sub> -H <sub>2</sub>           | 1.7347         | 1.9783         | 1.5646         | 1.8164         | 1.5684         | 1.7910         |
| H <sub>2</sub> -N <sub>3</sub>           | 1.0420         | 1.0203         | 1.0705         | 1.0297         | 1.0688         | 1.0320         |
| O <sub>4</sub> -H <sub>5</sub>           | 0.9842         | 1.0042         | 0.9894         | 1.0177         | 0.9904         | 1.0208         |
| H <sub>5</sub> -N <sub>6</sub>           | 1.7989         | 1.7029         | 1.7381         | 1.6265         | 1.7309         | 1.6140         |
| $\Delta(\text{O}_1\text{H}_2\text{N}_3)$ | 132.56         | 123.22         | 142.26         | 132.52         | 142.85         | 134.42         |
| $\Delta(\text{O}_4\text{H}_5\text{N}_6)$ | 146.10         | 148.13         | 147.02         | 149.56         | 147.16         | 149.87         |

**Table S2.** Parameters of bond lengths (Å) and bond angles ( $\Delta^\circ$ ) involved in dual hydrogen bonds for BDIBD-O-DPT, BDIBD-S-DPT and BDIBD-Se-DPT in CH<sub>3</sub>CN solvent in both S<sub>0</sub> and S<sub>1</sub> states.

|                                          | BDIBD-O-DPT    |                | BDIBD-S-DPT    |                | BDIBD-Se-DPT   |                |
|------------------------------------------|----------------|----------------|----------------|----------------|----------------|----------------|
|                                          | S <sub>0</sub> | S <sub>1</sub> | S <sub>0</sub> | S <sub>1</sub> | S <sub>0</sub> | S <sub>1</sub> |
| O <sub>1</sub> -H <sub>2</sub>           | 0.9867         | 1.9560         | 0.9922         | 1.8062         | 0.9933         | 1.7849         |
| H <sub>2</sub> -N <sub>3</sub>           | 1.7959         | 1.0205         | 1.7315         | 1.0299         | 1.7233         | 1.0319         |
| O <sub>4</sub> -H <sub>5</sub>           | 0.9867         | 1.9560         | 0.9922         | 1.8062         | 0.9933         | 1.7849         |
| H <sub>5</sub> -N <sub>6</sub>           | 1.7959         | 1.0205         | 1.7315         | 1.0299         | 1.7233         | 1.0319         |
| $\Delta(\text{O}_1\text{H}_2\text{N}_3)$ | 145.82         | 124.07         | 146.87         | 132.98         | 147.02         | 134.70         |
| $\Delta(\text{O}_4\text{H}_5\text{N}_6)$ | 145.82         | 124.07         | 146.87         | 132.98         | 147.02         | 134.70         |

**Table S3.** Simulated BCP parameters involved in the hydrogen bond O<sub>1</sub>-H<sub>2</sub>⋯N<sub>3</sub> or O<sub>4</sub>-H<sub>5</sub>⋯N<sub>6</sub> as well as predicted hydrogen bonding energy E<sub>HB</sub> (kcal/mol) for BDIBD-O, BDIBD-S and BDIBD-Se systems in CH<sub>3</sub>CN solvent in S<sub>0</sub> and S<sub>1</sub> states.

|          | States         | $\rho(r)$ | $V(r)$    | $G(r)$   | $H(r)$    | $E(HB)$ |
|----------|----------------|-----------|-----------|----------|-----------|---------|
| BDIBD-O  | S <sub>0</sub> | 0.041983  | -0.037481 | 0.031860 | -0.005621 | -8.623  |
|          | S <sub>1</sub> | 0.044600  | -0.040682 | 0.033778 | -0.005893 | -9.207  |
| BDIBD-S  | S <sub>0</sub> | 0.049915  | -0.047067 | 0.037387 | -0.009681 | -10.393 |
|          | S <sub>1</sub> | 0.056297  | -0.054889 | 0.041583 | -0.013306 | -11.816 |
| BDIBD-Se | S <sub>0</sub> | 0.051167  | -0.048515 | 0.038125 | -0.01039  | -10.672 |
|          | S <sub>1</sub> | 0.057761  | -0.056585 | 0.042386 | -0.014199 | -12.143 |

$\rho(r)$ : Density of all electrons.

$V(r)$ : Potential energy density.

$G(r)$ : Lagrangian kinetic energy.

$H(r)$ : Energy density.

$E_{HB}$ : Hydrogen bonding energy based on  $-223.08*\rho(r)+0.7423$ .

**Table S4.** Vertical excitation energies ( $\lambda$  nm), oscillator strength ( $f$ ), transition compositions and percentages for BDIBD-O, BDIBD-S and BDIBD-Se compounds in CH<sub>3</sub>CN solvent based on CAM-B3LYP functional.

|          | Transition                      | $\lambda$ | $f$    | Composition | CI (%) |
|----------|---------------------------------|-----------|--------|-------------|--------|
| BDIBD-O  | S <sub>0</sub> → S <sub>1</sub> | 369.79    | 1.2636 | H → L       | 95.96  |
|          | S <sub>0</sub> → S <sub>2</sub> | 309.77    | 0.2753 | H-2 → L     | 91.64  |
|          | S <sub>0</sub> → S <sub>3</sub> | 299.70    | 0.0000 | H-1 → L     | 90.87  |
| BDIBD-S  | S <sub>0</sub> → S <sub>1</sub> | 390.84    | 1.1655 | H → L       | 96.03  |
|          | S <sub>0</sub> → S <sub>2</sub> | 322.45    | 0.3085 | H-1 → L     | 91.28  |
|          | S <sub>0</sub> → S <sub>3</sub> | 305.43    | 0.0027 | H-2 → L     | 89.79  |
| BDIBD-Se | S <sub>0</sub> → S <sub>1</sub> | 401.82    | 1.1469 | H → L       | 96.57  |
|          | S <sub>0</sub> → S <sub>2</sub> | 330.88    | 0.2304 | H-1 → L     | 91.77  |
|          | S <sub>0</sub> → S <sub>3</sub> | 316.02    | 0.0019 | H-2 → L     | 90.35  |

**Table S5.** The calculated Mulliken's charge and NPA charge of O<sub>1</sub>, H<sub>2</sub>, N<sub>3</sub>, O<sub>4</sub>, H<sub>5</sub> and N<sub>6</sub> atoms for BDIBD-O, BDIBD-S and BDIBD-Se in CH<sub>3</sub>CN solvent in both S<sub>0</sub> and S<sub>1</sub> states.

|          | atoms          | Mulliken's charge |                | NPA charge     |                |
|----------|----------------|-------------------|----------------|----------------|----------------|
|          |                | S <sub>0</sub>    | S <sub>1</sub> | S <sub>0</sub> | S <sub>1</sub> |
| BDIBD-O  | O <sub>1</sub> | -0.300            | -0.296         | -0.667         | -0.666         |
|          | H <sub>2</sub> | 0.308             | 0.309          | 0.506          | 0.506          |
|          | N <sub>3</sub> | -0.167            | -0.168         | -0.496         | -0.497         |
|          | O <sub>4</sub> | -0.300            | -0.296         | -0.667         | -0.666         |
|          | H <sub>5</sub> | 0.308             | 0.309          | 0.506          | 0.506          |
|          | N <sub>6</sub> | -0.167            | -0.168         | -0.496         | -0.497         |
| BDIBD-S  | O <sub>1</sub> | -0.305            | -0.299         | -0.672         | -0.670         |
|          | H <sub>2</sub> | 0.320             | 0.322          | 0.504          | 0.503          |
|          | N <sub>3</sub> | -0.135            | -0.138         | -0.480         | -0.482         |
|          | O <sub>4</sub> | -0.305            | -0.299         | -0.672         | -0.670         |
|          | H <sub>5</sub> | 0.320             | 0.322          | 0.504          | 0.503          |
|          | N <sub>6</sub> | -0.135            | -0.138         | -0.480         | -0.482         |
| BDIBD-Se | O <sub>1</sub> | -0.305            | -0.299         | -0.672         | -0.670         |
|          | H <sub>2</sub> | 0.322             | 0.324          | 0.503          | 0.502          |
|          | N <sub>3</sub> | -0.146            | -0.149         | -0.490         | -0.493         |
|          | O <sub>4</sub> | -0.305            | -0.299         | -0.672         | -0.670         |
|          | H <sub>5</sub> | 0.322             | 0.324          | 0.503          | 0.502          |
|          | N <sub>6</sub> | -0.146            | -0.149         | -0.490         | -0.493         |

**Table S6.** The absolute energies (a.u.) of the stable optimized S<sub>1</sub>-state A, B as well as C points of respective BDIBD-O, BDIBD-S and BDIBD-Se fluorophores.

|   | BDIBD-O    | BDIBD-S    | BDIBD-Se   |
|---|------------|------------|------------|
| A | -1797.2890 | -2443.2254 | -6449.9610 |
| B | -1797.2858 | -2443.2277 | -6449.9638 |
| C | -1797.2891 | -2443.2318 | -6449.9687 |

## The coordinates of the searched TS forms in S<sub>1</sub> state

BDIBD-O (TS1):

|   | X           | Y           | Z           |
|---|-------------|-------------|-------------|
| C | -1.41836300 | 0.23590400  | 0.01849900  |
| C | -0.73313900 | -1.06663900 | 0.03188500  |
| C | 0.66584400  | -1.08499700 | 0.03163800  |
| C | 1.42192300  | 0.09743500  | 0.01391700  |
| C | 0.72280500  | 1.36963300  | -0.00548800 |
| C | -0.66470600 | 1.41565500  | -0.00192200 |
| H | 1.16223600  | -2.04531100 | 0.03811100  |
| H | -1.15112700 | 2.38152500  | -0.01001900 |
| C | -4.95249100 | 0.74263000  | 0.01808400  |
| C | -4.84929800 | -0.64036500 | 0.02182000  |
| C | 4.91483200  | 0.69243900  | -0.00484000 |
| C | 4.88260300  | -0.69421100 | -0.01695800 |
| C | 2.83400600  | 0.09958000  | -0.00888800 |
| C | -2.81865000 | 0.19415700  | 0.04613800  |
| N | 3.63074700  | 1.16300900  | -0.01739900 |
| N | -3.51786200 | -0.94638000 | 0.06234000  |
| C | 6.05082500  | 1.62015800  | 0.05796400  |
| C | 6.02208900  | 2.80349100  | -0.68975400 |
| C | 7.14709900  | 1.37109400  | 0.89226400  |
| C | 7.07643300  | 3.70661900  | -0.61956900 |
| H | 5.17227100  | 3.00651600  | -1.32886600 |
| C | 8.19855400  | 2.27654400  | 0.96209200  |
| H | 7.16904400  | 0.47072000  | 1.49234900  |
| C | 8.16918300  | 3.44513200  | 0.20381100  |
| H | 7.04569900  | 4.61468200  | -1.20898100 |
| H | 9.03865500  | 2.07329400  | 1.61456200  |
| H | 8.98999900  | 4.14940100  | 0.25850400  |
| C | 5.85089100  | -1.76102200 | -0.08281800 |
| C | 7.14923500  | -1.54997300 | -0.58703600 |
| C | 5.49493000  | -3.06140800 | 0.32810200  |
| C | 8.05893500  | -2.59367600 | -0.64916300 |
| H | 7.43525800  | -0.57101100 | -0.94407100 |
| C | 6.41265200  | -4.09957000 | 0.25891600  |
| H | 4.49960200  | -3.24516000 | 0.70965100  |
| C | 7.70082800  | -3.87381600 | -0.22389100 |
| H | 9.05118600  | -2.41170100 | -1.04339400 |
| H | 6.12248100  | -5.09038800 | 0.58647400  |
| H | 8.41505500  | -4.68582300 | -0.27584800 |
| C | -5.86637500 | -1.69207800 | -0.04486700 |
| C | -5.70154000 | -2.86399000 | 0.70366900  |

|   |             |             |             |
|---|-------------|-------------|-------------|
| C | -6.97945100 | -1.56896300 | -0.88517400 |
| C | -6.64244500 | -3.88370900 | 0.62601200  |
| H | -4.84084400 | -2.96844100 | 1.35225900  |
| C | -7.91635000 | -2.59125400 | -0.96057400 |
| H | -7.10264600 | -0.67701100 | -1.48517000 |
| C | -7.75339400 | -3.74950600 | -0.20323200 |
| H | -6.50911900 | -4.78246400 | 1.21499700  |
| H | -8.77123500 | -2.48691600 | -1.61684700 |
| H | -8.48590200 | -4.54470500 | -0.26289300 |
| C | -6.02829400 | 1.69864900  | 0.06179600  |
| C | -7.30122700 | 1.35452200  | 0.55895900  |
| C | -5.80804600 | 3.02468800  | -0.36318700 |
| C | -8.31728900 | 2.29537600  | 0.59974800  |
| H | -7.48387900 | 0.35569200  | 0.92853600  |
| C | -6.83235300 | 3.95848800  | -0.31484400 |
| H | -4.83476500 | 3.30956300  | -0.73926800 |
| C | -8.09344600 | 3.60124700  | 0.16045200  |
| H | -9.28787300 | 2.01346800  | 0.98879000  |
| H | -6.64731500 | 4.97064900  | -0.65285300 |
| H | -8.89077400 | 4.33272000  | 0.19612600  |
| O | -1.43105600 | -2.16587200 | 0.03762300  |
| H | -2.66544800 | -1.82599000 | 0.04230900  |
| O | 1.39277600  | 2.52609500  | -0.02177500 |
| H | 2.37534900  | 2.33596000  | -0.01639200 |
| O | 3.54547600  | -1.06482900 | -0.00019600 |
| O | -3.65431600 | 1.25894900  | 0.01509700  |

BDIBD-O (TS2):

|   | X           | Y           | Z           |
|---|-------------|-------------|-------------|
| C | 1.40751300  | -0.16180900 | -0.00394900 |
| C | 0.73173400  | -1.46972200 | -0.00014600 |
| C | -0.69260700 | -1.45980400 | 0.00770800  |
| C | -1.43410300 | -0.28186300 | 0.01225600  |
| C | -0.74510500 | 1.00687700  | 0.00749400  |
| C | 0.66009100  | 1.01913800  | -0.00071600 |
| H | -1.19231900 | -2.42002800 | 0.01709200  |
| H | 1.15223800  | 1.98280600  | -0.01070300 |
| C | 4.88975100  | 0.67462300  | -0.02976500 |
| C | 4.97952700  | -0.69083200 | -0.01691500 |
| C | -4.86524100 | 0.63025900  | 0.01474200  |
| C | -4.98354800 | -0.74215800 | 0.02698000  |
| C | -2.84261600 | -0.22002100 | 0.04209100  |
| C | 2.81363200  | -0.13064800 | -0.03297300 |
| N | -3.52365000 | 0.92699100  | 0.04617200  |



|   |             |             |             |
|---|-------------|-------------|-------------|
| N | 3.67963500  | -1.15795600 | -0.04205000 |
| C | -5.87069400 | 1.69513800  | -0.06003300 |
| C | -5.68824100 | 2.87539400  | 0.67042800  |
| C | -6.99342500 | 1.57346200  | -0.88693200 |
| C | -6.61921300 | 3.90455100  | 0.58775100  |
| H | -4.81958800 | 2.98044100  | 1.30836500  |
| C | -7.92217600 | 2.60339600  | -0.96610400 |
| H | -7.13231700 | 0.67384900  | -1.47206200 |
| C | -7.74039300 | 3.77084500  | -0.22737300 |
| H | -6.46977000 | 4.81027000  | 1.16226300  |
| H | -8.78527400 | 2.49785800  | -1.61157900 |
| H | -8.46542900 | 4.57265000  | -0.29085000 |
| C | -6.07105200 | -1.69313300 | 0.08176900  |
| C | -7.32814000 | -1.34162500 | 0.60637900  |
| C | -5.87508600 | -3.01366000 | -0.36311500 |
| C | -8.35604400 | -2.27108400 | 0.65486300  |
| H | -7.49227800 | -0.34344900 | 0.98730800  |
| C | -6.90879500 | -3.93878900 | -0.30442200 |
| H | -4.91206100 | -3.30500800 | -0.76059200 |
| C | -8.15616900 | -3.57422800 | 0.19815400  |
| H | -9.31618200 | -1.98141400 | 1.06402600  |
| H | -6.74020200 | -4.94915200 | -0.65657700 |
| H | -8.96088000 | -4.29726500 | 0.24121600  |
| C | 6.11959700  | -1.60782500 | 0.04552000  |
| C | 6.13560400  | -2.76033000 | -0.74841400 |
| C | 7.18439100  | -1.36094600 | 0.91960000  |
| C | 7.20544500  | -3.64497700 | -0.67494900 |
| H | 5.32021000  | -2.95641300 | -1.43375900 |
| C | 8.25214200  | -2.24600800 | 0.98617800  |
| H | 7.16875400  | -0.47995800 | 1.54770300  |
| C | 8.26663400  | -3.38907900 | 0.18911800  |
| H | 7.21161100  | -4.53113300 | -1.29688500 |
| H | 9.07042000  | -2.04781600 | 1.66687200  |
| H | 9.09993400  | -4.07821300 | 0.24416100  |
| C | 5.83252100  | 1.77088000  | -0.07435900 |
| C | 7.12845500  | 1.59833000  | -0.59033500 |
| C | 5.44691400  | 3.04477300  | 0.37765300  |
| C | 8.01553600  | 2.66347300  | -0.62638700 |
| H | 7.43356800  | 0.63455700  | -0.97308100 |
| C | 6.34112100  | 4.10601100  | 0.33224400  |
| H | 4.44984900  | 3.19427400  | 0.76970600  |
| C | 7.62977500  | 3.92173500  | -0.16376600 |
| H | 9.00987700  | 2.51493700  | -1.02876800 |
| H | 6.03097200  | 5.08036800  | 0.68891800  |

|   |             |             |             |
|---|-------------|-------------|-------------|
| H | 8.32527400  | 4.75079300  | -0.19666800 |
| O | 1.39953800  | -2.54813800 | 0.00173000  |
| H | 3.31951200  | -2.11158300 | -0.00014700 |
| O | -1.42574500 | 2.12019000  | 0.00470700  |
| H | -2.64294300 | 1.79982100  | 0.01568300  |
| O | -3.68613800 | -1.27642100 | 0.02727200  |
| O | 3.53218400  | 1.01230700  | -0.02772600 |

BDIBD-S (TS1):

|   | X           | Y           | Z           |
|---|-------------|-------------|-------------|
| C | -1.41525900 | 0.07778600  | -0.02618400 |
| C | -0.81398700 | -1.24704100 | -0.03216600 |
| C | 0.57004200  | -1.40458900 | -0.04046600 |
| C | 1.43192300  | -0.30755400 | -0.04175100 |
| C | 0.84413300  | 1.03861900  | -0.02518900 |
| C | -0.54988000 | 1.17661300  | -0.02448600 |
| H | 0.95529800  | -2.41616600 | -0.05035500 |
| H | -0.93917000 | 2.18647800  | -0.01782700 |
| C | -5.24149300 | 0.83219600  | 0.00863800  |
| C | -4.96877600 | -0.53141600 | 0.01200800  |
| C | 4.94094900  | 0.49636900  | -0.00385400 |
| C | 5.29919600  | -0.84538800 | -0.00119300 |
| C | 2.84463400  | -0.40440000 | -0.05283400 |
| C | -2.83382600 | 0.19761300  | -0.02579400 |
| N | 3.60215000  | 0.70671900  | -0.05063400 |
| N | -3.65289200 | -0.85717200 | -0.02194000 |
| C | 5.83155100  | 1.66838400  | 0.07895900  |
| C | 5.57552000  | 2.79420200  | -0.71209100 |
| C | 6.91201500  | 1.69193300  | 0.96811400  |
| C | 6.39321900  | 3.91524000  | -0.62509500 |
| H | 4.74148000  | 2.78467100  | -1.40256900 |
| C | 7.72533000  | 2.81455900  | 1.05443500  |
| H | 7.10861000  | 0.83158900  | 1.59383900  |
| C | 7.47149900  | 3.92810500  | 0.25607800  |
| H | 6.18940200  | 4.77754500  | -1.24763700 |
| H | 8.55550700  | 2.82267500  | 1.74971300  |
| H | 8.10794900  | 4.80160500  | 0.32355500  |
| C | 6.61421300  | -1.46919500 | -0.05764100 |
| C | 7.64965400  | -0.90150800 | -0.82322800 |
| C | 6.87272800  | -2.67403700 | 0.62037500  |
| C | 8.89735300  | -1.50393200 | -0.88389400 |
| H | 7.46578700  | 0.00764500  | -1.37870700 |
| C | 8.12251600  | -3.27515300 | 0.55106400  |
| H | 6.09607700  | -3.12877000 | 1.22339200  |
| C | 9.14334900  | -2.69235200 | -0.19664600 |

|   |             |             |             |
|---|-------------|-------------|-------------|
| H | 9.67912500  | -1.05124700 | -1.48141100 |
| H | 8.30162600  | -4.19825300 | 1.08841600  |
| H | 10.11777100 | -3.16139400 | -0.24903700 |
| C | -5.95400500 | -1.62927900 | 0.09228100  |
| C | -5.78851000 | -2.77201800 | -0.69848200 |
| C | -7.03709700 | -1.56856800 | 0.97637600  |
| C | -6.69579600 | -3.82273000 | -0.61882500 |
| H | -4.94958500 | -2.82894300 | -1.38043900 |
| C | -7.94067400 | -2.62108900 | 1.05721900  |
| H | -7.16642800 | -0.69619300 | 1.60326000  |
| C | -7.77618800 | -3.74998200 | 0.25724800  |
| H | -6.55982800 | -4.69795700 | -1.24220900 |
| H | -8.77160100 | -2.56233600 | 1.74940500  |
| H | -8.48234300 | -4.56869100 | 0.31973800  |
| C | -6.51209700 | 1.54463800  | -0.05981900 |
| C | -6.69901600 | 2.76077500  | 0.62110800  |
| C | -7.57407700 | 1.05145000  | -0.83988000 |
| C | -7.90507600 | 3.44475200  | 0.53990200  |
| H | -5.90047100 | 3.16014300  | 1.23459900  |
| C | -8.77842500 | 1.73585900  | -0.91287200 |
| H | -7.44466400 | 0.13337400  | -1.39611800 |
| C | -8.95343000 | 2.93510200  | -0.22288700 |
| H | -8.02847400 | 4.37565900  | 1.07963500  |
| H | -9.58132300 | 1.33835900  | -1.52168000 |
| H | -9.89370400 | 3.46843900  | -0.28455800 |
| O | -1.56692400 | -2.34310700 | -0.02868200 |
| H | -2.54026300 | -2.05442900 | -0.01860800 |
| O | 1.61845900  | 2.08658000  | -0.01038900 |
| H | 2.76390500  | 1.65372300  | -0.01963800 |
| S | 3.83783800  | -1.85362700 | -0.02504600 |
| S | -3.71877800 | 1.73013100  | -0.00403800 |

BDIBD-S (TS2):

|   | X           | Y           | Z           |
|---|-------------|-------------|-------------|
| C | -1.40483900 | 0.01831300  | -0.04709300 |
| C | -0.82747600 | -1.33944500 | -0.04048500 |
| C | 0.59408800  | -1.44481500 | -0.04945200 |
| C | 1.44497900  | -0.34714100 | -0.05317400 |
| C | 0.85405900  | 0.98760500  | -0.05163100 |
| C | -0.54508300 | 1.11693800  | -0.05259000 |
| H | 0.99361100  | -2.45203000 | -0.05055800 |
| H | -0.93149000 | 2.12905700  | -0.05702000 |

|   |             |             |             |
|---|-------------|-------------|-------------|
| C | -5.25092400 | 0.81998000  | 0.00742600  |
| C | -5.02888900 | -0.53326300 | -0.00085100 |
| C | 4.95535100  | 0.48842800  | -0.00788900 |
| C | 5.32443900  | -0.84263200 | 0.01647600  |
| C | 2.86511100  | -0.42769700 | -0.05599800 |
| C | -2.81465200 | 0.17850500  | -0.05096600 |
| N | 3.60996400  | 0.68934100  | -0.06507100 |
| N | -3.69526400 | -0.84664800 | -0.04947700 |
| C | 5.83557000  | 1.67096900  | 0.05818200  |
| C | 5.56950200  | 2.78417100  | -0.74705400 |
| C | 6.91952800  | 1.71598100  | 0.94187800  |
| C | 6.37928100  | 3.91268700  | -0.67920400 |
| H | 4.73209700  | 2.75964600  | -1.43314700 |
| C | 7.72656200  | 2.84486900  | 1.00822900  |
| H | 7.12497800  | 0.86582400  | 1.57870200  |
| C | 7.46183700  | 3.94579000  | 0.19606100  |
| H | 6.16584000  | 4.76498400  | -1.31239500 |
| H | 8.56008900  | 2.86788900  | 1.69931800  |
| H | 8.09240800  | 4.82462800  | 0.24854500  |
| C | 6.64814900  | -1.45896000 | -0.02496800 |
| C | 7.66744600  | -0.91829400 | -0.82752100 |
| C | 6.92782100  | -2.62317800 | 0.70949000  |
| C | 8.92375700  | -1.50626500 | -0.86994500 |
| H | 7.46601600  | -0.03776200 | -1.42229800 |
| C | 8.18476800  | -3.21344400 | 0.65679100  |
| H | 6.16118300  | -3.05681700 | 1.34036900  |
| C | 9.19118500  | -2.65627900 | -0.12821400 |
| H | 9.69459900  | -1.07280500 | -1.49545500 |
| H | 8.37983600  | -4.10739500 | 1.23641700  |
| H | 10.17093200 | -3.11559700 | -0.16719200 |
| C | -6.01011700 | -1.62961700 | 0.06426600  |
| C | -5.87095100 | -2.74601500 | -0.76790500 |
| C | -7.07441700 | -1.57932900 | 0.97108200  |
| C | -6.78694400 | -3.78990200 | -0.69847800 |
| H | -5.05686500 | -2.79125300 | -1.48107900 |
| C | -7.98759600 | -2.62346000 | 1.03564900  |
| H | -7.18018600 | -0.72379600 | 1.62474600  |
| C | -7.84813100 | -3.73036400 | 0.20055600  |
| H | -6.67351700 | -4.64659300 | -1.35080200 |
| H | -8.80589000 | -2.57643100 | 1.74317600  |
| H | -8.56161600 | -4.54317500 | 0.25285700  |
| C | -6.50758600 | 1.56541900  | -0.02988300 |
| C | -6.66745800 | 2.74399000  | 0.71501300  |
| C | -7.57249700 | 1.12988400  | -0.83501900 |

|   |             |             |             |
|---|-------------|-------------|-------------|
| C | -7.86098200 | 3.45401200  | 0.66906700  |
| H | -5.86137300 | 3.09457600  | 1.34818700  |
| C | -8.76489300 | 1.83882500  | -0.87129600 |
| H | -7.45789100 | 0.23774700  | -1.43553200 |
| C | -8.91629800 | 3.00319200  | -0.11973500 |
| H | -7.96820800 | 4.35771600  | 1.25602000  |
| H | -9.57540900 | 1.48822100  | -1.49821200 |
| H | -9.84647700 | 3.55632000  | -0.15344200 |
| O | -1.56423100 | -2.37282400 | -0.02695800 |
| H | -3.27941600 | -1.78801000 | -0.01767500 |
| O | 1.61404800  | 2.04975700  | -0.04849500 |
| H | 2.75398500  | 1.63205800  | -0.04909200 |
| S | 3.86895200  | -1.86733900 | -0.00208500 |
| S | -3.70025700 | 1.68995900  | -0.02565700 |

BDIBD-Se (TS1):

|   | X           | Y           | Z           |
|---|-------------|-------------|-------------|
| C | 1.43262300  | -0.28942300 | -0.05456400 |
| C | 0.83787000  | 1.05477500  | -0.04393200 |
| C | -0.55592500 | 1.18686300  | -0.04406000 |
| C | -1.41943400 | 0.08678600  | -0.04160800 |
| C | -0.81151500 | -1.23729900 | -0.04681400 |
| C | 0.57221000  | -1.38799200 | -0.05415600 |
| H | -0.94651000 | 2.19653600  | -0.04264600 |
| H | 0.96013400  | -2.39867600 | -0.06397500 |
| C | 5.40786600  | -0.72600400 | 0.01723000  |
| C | 4.94175300  | 0.57999300  | -0.00512500 |
| C | -4.97550300 | -0.60139100 | 0.00967700  |
| C | -5.36423200 | 0.73170200  | 0.02500500  |
| C | -2.83805600 | 0.20161100  | -0.03428800 |
| C | 2.84515900  | -0.38532200 | -0.05797600 |
| N | -3.64417400 | -0.85827500 | -0.03687500 |
| N | 3.59436300  | 0.72843200  | -0.06287700 |
| C | -5.88513100 | -1.76671600 | 0.08251300  |
| C | -5.65650500 | -2.88096300 | -0.73282400 |
| C | -6.95736200 | -1.79484300 | 0.98119600  |
| C | -6.49147100 | -3.99067600 | -0.66256100 |
| H | -4.82586100 | -2.86953700 | -1.42712600 |
| C | -7.78840100 | -2.90624000 | 1.05310400  |
| H | -7.13519500 | -0.94488500 | 1.62666600  |
| C | -7.56174200 | -4.00638200 | 0.22872800  |
| H | -6.30714900 | -4.84282200 | -1.30524200 |
| H | -8.61129600 | -2.91570800 | 1.75725200  |

|    |              |             |             |
|----|--------------|-------------|-------------|
| H  | -8.21147800  | -4.87104500 | 0.28406700  |
| C  | -6.69905800  | 1.31604600  | -0.04019400 |
| C  | -7.68897900  | 0.75822000  | -0.87035200 |
| C  | -7.02508100  | 2.47051800  | 0.69335200  |
| C  | -8.95533300  | 1.32016000  | -0.94249900 |
| H  | -7.45405200  | -0.11388700 | -1.46498700 |
| C  | -8.29307400  | 3.03190100  | 0.61451100  |
| H  | -6.28498700  | 2.91640000  | 1.34707100  |
| C  | -9.26708400  | 2.45848900  | -0.19984200 |
| H  | -9.70021500  | 0.87468900  | -1.59063900 |
| H  | -8.52281100  | 3.91646200  | 1.19582800  |
| H  | -10.25553000 | 2.89632600  | -0.26032300 |
| C  | 5.75808800   | 1.80909000  | 0.06821400  |
| C  | 5.44956700   | 2.90048800  | -0.75174600 |
| C  | 6.81881800   | 1.91740400  | 0.97441700  |
| C  | 6.19621000   | 4.07093200  | -0.67571800 |
| H  | 4.63073800   | 2.82576000  | -1.45634000 |
| C  | 7.56095900   | 3.08916100  | 1.05025400  |
| H  | 7.05589500   | 1.08365200  | 1.62174000  |
| C  | 7.25530900   | 4.16819800  | 0.22325800  |
| H  | 5.95222200   | 4.90583600  | -1.32081900 |
| H  | 8.37609100   | 3.16226700  | 1.75944400  |
| H  | 7.83637600   | 5.08008000  | 0.28228000  |
| C  | 6.77511100   | -1.22637700 | -0.03481000 |
| C  | 7.15877100   | -2.36778200 | 0.69178600  |
| C  | 7.74081000   | -0.60099600 | -0.84576300 |
| C  | 8.45866000   | -2.85163500 | 0.62504400  |
| H  | 6.43856400   | -2.86376500 | 1.33158000  |
| C  | 9.03889700   | -1.08601100 | -0.90510200 |
| H  | 7.46259800   | 0.26089000  | -1.43644900 |
| C  | 9.40749800   | -2.21203600 | -0.16957500 |
| H  | 8.73294800   | -3.72709500 | 1.20063000  |
| H  | 9.76460600   | -0.59046700 | -1.53834000 |
| H  | 10.42096300  | -2.58961800 | -0.22052800 |
| O  | 1.60757600   | 2.10662300  | -0.03382600 |
| H  | 2.74486400   | 1.67499500  | -0.03962500 |
| O  | -1.56039300  | -2.33552900 | -0.04342700 |
| H  | -2.53545100  | -2.04470600 | -0.03440100 |
| Se | -3.81882100  | 1.84549600  | 0.01414300  |
| Se | 3.93211500   | -1.94217400 | -0.00348100 |

BDIBD-Se (TS2):

X

Y

Z

|   |             |             |             |
|---|-------------|-------------|-------------|
| C | -1.41191000 | 0.03289700  | -0.05484900 |
| C | -0.82669700 | -1.32396300 | -0.05040200 |
| C | 0.59541800  | -1.42331600 | -0.05931200 |
| C | 1.44489600  | -0.32569900 | -0.06051600 |
| C | 0.84640600  | 1.00717500  | -0.06091400 |
| C | -0.55214400 | 1.13172000  | -0.06235400 |
| H | 0.99608200  | -2.43021900 | -0.06278100 |
| H | -0.93864800 | 2.14411400  | -0.06889800 |
| C | -5.37866700 | 0.72436200  | 0.02364300  |
| C | -5.03723900 | -0.60147100 | 0.00075000  |
| C | 4.95565200  | 0.57456800  | -0.00702100 |
| C | 5.43157300  | -0.72002100 | 0.03148700  |
| C | 2.86545400  | -0.40519200 | -0.05800200 |
| C | -2.82143800 | 0.19118000  | -0.05454400 |
| N | 3.60216600  | 0.71387000  | -0.07177400 |
| N | -3.68779200 | -0.84442800 | -0.05562600 |
| C | 5.76127300  | 1.81309800  | 0.05259000  |
| C | 5.44383500  | 2.89366100  | -0.77803600 |
| C | 6.82404700  | 1.94026400  | 0.95360500  |
| C | 6.18219700  | 4.07065200  | -0.71737700 |
| H | 4.62264300  | 2.80602100  | -1.47845900 |
| C | 7.55971300  | 3.11740200  | 1.01327300  |
| H | 7.06910500  | 1.11522800  | 1.60922000  |
| C | 7.24420300  | 4.18557800  | 0.17597700  |
| H | 5.92942500  | 4.89685500  | -1.37044200 |
| H | 8.37718000  | 3.20332700  | 1.71849800  |
| H | 7.81913700  | 5.10209900  | 0.22297400  |
| C | 6.80558100  | -1.21362100 | -0.01262600 |
| C | 7.75790600  | -0.61288000 | -0.85455800 |
| C | 7.20558000  | -2.31896300 | 0.75656200  |
| C | 9.06216100  | -1.08483000 | -0.90250500 |
| H | 7.46589100  | 0.22366300  | -1.47485800 |
| C | 8.51049900  | -2.79331700 | 0.69966200  |
| H | 6.49316600  | -2.79684700 | 1.41860200  |
| C | 9.44757400  | -2.17665400 | -0.12572100 |
| H | 9.77878300  | -0.60630900 | -1.55895400 |
| H | 8.79699500  | -3.64319200 | 1.30698300  |
| H | 10.46463500 | -2.54566700 | -0.16863700 |
| C | -5.94143000 | -1.76654600 | 0.05824700  |
| C | -5.74083100 | -2.85466100 | -0.79836700 |
| C | -6.99311200 | -1.80623900 | 0.97991100  |
| C | -6.58377500 | -3.95906700 | -0.73818200 |
| H | -4.93633500 | -2.83119200 | -1.52337000 |
| C | -7.83352800 | -2.91043600 | 1.03556600  |

|    |              |             |             |
|----|--------------|-------------|-------------|
| H  | -7.14648000  | -0.97240000 | 1.65190400  |
| C  | -7.63313400  | -3.98888600 | 0.17607700  |
| H  | -6.42295900  | -4.79311600 | -1.40965800 |
| H  | -8.64254800  | -2.93223100 | 1.75494200  |
| H  | -8.28980800  | -4.84867000 | 0.22121100  |
| C  | -6.70300700  | 1.34189700  | -0.01261600 |
| C  | -6.99931100  | 2.46261300  | 0.77836600  |
| C  | -7.70104700  | 0.83992800  | -0.86393300 |
| C  | -8.25751100  | 3.05058000  | 0.73236600  |
| H  | -6.24729800  | 2.86227500  | 1.44822900  |
| C  | -8.95817600  | 1.42679200  | -0.90164500 |
| H  | -7.48299100  | -0.00869400 | -1.49815500 |
| C  | -9.24381500  | 2.53366100  | -0.10386800 |
| H  | -8.46898600  | 3.91050800  | 1.35571600  |
| H  | -9.71481400  | 1.02578400  | -1.56473700 |
| H  | -10.22429000 | 2.99173400  | -0.13824700 |
| O  | -1.55635600  | -2.36167400 | -0.03902900 |
| H  | -3.24568400  | -1.77633800 | -0.02978300 |
| O  | 1.60218100   | 2.07256900  | -0.05972200 |
| H  | 2.73114600   | 1.65794000  | -0.05961600 |
| Se | 3.96225400   | -1.95223000 | 0.01770200  |
| Se | -3.80089200  | 1.80983200  | -0.01076800 |
